# Supplementary material for: Improved electrochemical properties of morphology-controlled titania/titanate nanostructures prepared by in-situ hydrothermal surface modification of self-source Ti substrate for high-performance supercapacitors
Source: PubMed Central journal article supplement (PMC5643498; doi:10.1038/s41598-017-11346-2), 2017-10-16
Supplement: 41598_2017_11346_MOESM1_ESM.pdf [file 41598_2017_11346_MOESM1_ESM.pdf]

## **SUPPLEMENTARY DATA**

**Improved electrochemical properties of morphology-controlled titania/titanate nanostructures prepared by in-situ hydrothermal surface modification of self-source Ti substrate for high-performance supercapacitors**

**Arghya Narayan Banerjee<sup>1</sup>, V C Anitha<sup>2\*</sup>, Sang W Joo<sup>1\*</sup>**

<sup>1</sup>School of Mechanical Engineering, Yeungnam University, Gyeongsan 712-749, Republic of Korea

<sup>2</sup>Center of Materials and Nanotechnologies, Faculty of Chemical Technology, University of Pardubice, Nam. Cs. Legii 565, 53002 Pardubice, Czech Republic

\*Corresponding authors:

[vc.anitha@gmail.com](mailto:vc.anitha@gmail.com) (VCA);

[swjoo@yu.ac.kr](mailto:swjoo@yu.ac.kr) (SWJ); Ph. +82-53-810-3239, Fax: +82-53-810-2062

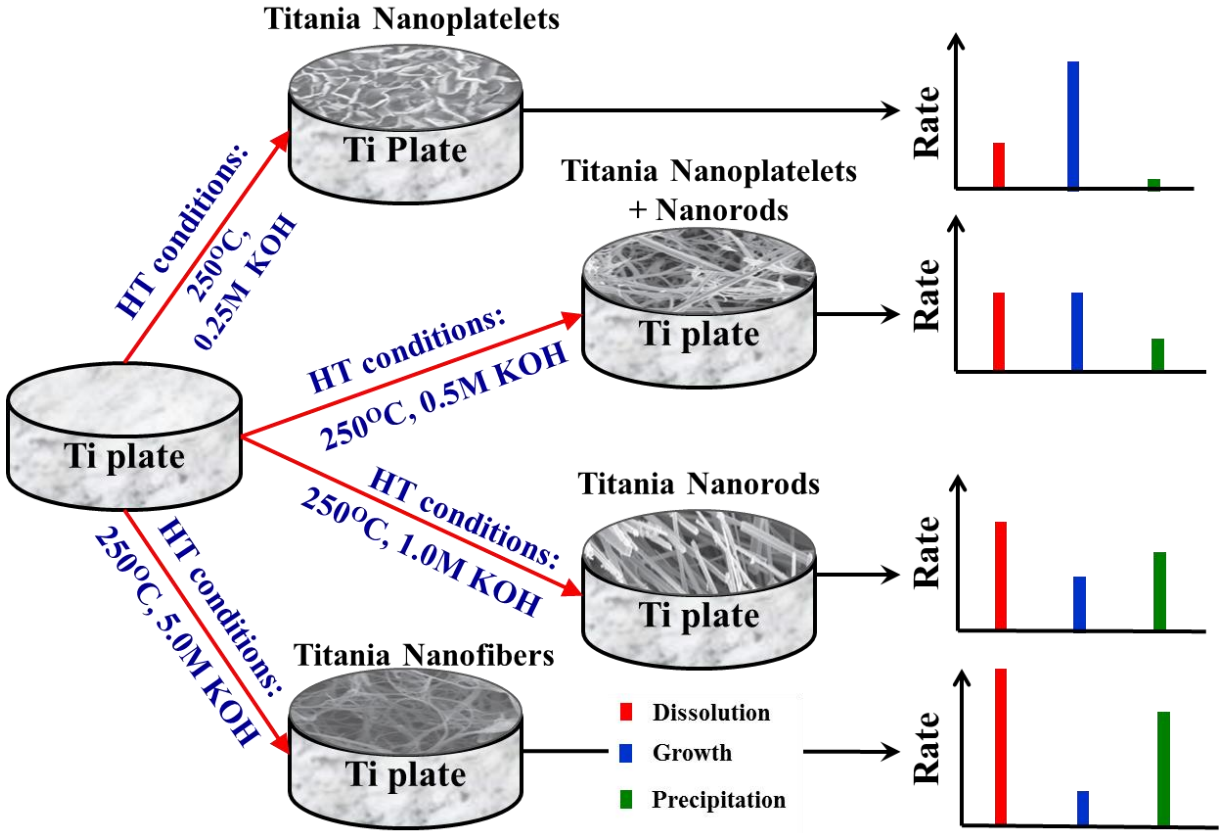

**Figure S1:** Schematic and pictorial representation of the hydrothermal synthesis of various titania nanostructures on the self-source Ti substrate under different KOH concentrations. Right-hand panel describes the relative dissolution, growth and precipitation rates of  $\text{TiO}_2$  on the Ti substrate as a function of KOH concentrations.

**Table S1:** A comparison of the  $2\theta$ -values of different diffraction peaks observed in the XRD data (Fig. 2b) with the 1999 JCPDS-ICDD File. Also  $d$ -values of Rutile titania for (110) and (101) planes obtained from Fig. 3 and Fig. S2 are compared with 1999 JCPDS-ICDD File.

| Peak origin                                       |       | $2\theta_{\text{EXPT}}$ (deg.)<br>(From Fig. 2b)          | $2\theta_{\text{JCPDS}}$<br>(1999 JCPDS-ICDD File) | 1999 JCPDS File Card # |
|---------------------------------------------------|-------|-----------------------------------------------------------|----------------------------------------------------|------------------------|
| TiO (110)                                         |       | 35.6                                                      | 35.9                                               | 12-0754                |
| Rutile TiO <sub>2</sub>                           | (101) | 36.8                                                      | 36.2                                               | 78-1510                |
|                                                   | (202) | 76.6                                                      | 76.7                                               |                        |
| Anatase TiO <sub>2</sub>                          | (200) | 48.0                                                      | 48.1                                               | 84-1286                |
|                                                   | (105) | 53.6                                                      | 53.9                                               |                        |
|                                                   | (220) | 70.7                                                      | 70.3                                               |                        |
| Ti                                                |       | 40.1                                                      | 40.2                                               | 05-0682                |
|                                                   |       | 63.2                                                      | 63.0                                               |                        |
|                                                   |       | 77.5                                                      | 77.3                                               |                        |
| K-Titanate                                        |       | 11.6                                                      | 11.5                                               | 74-0275                |
|                                                   |       | 24.4                                                      | 24.6                                               |                        |
|                                                   |       | 25.5                                                      | 25.6                                               |                        |
|                                                   |       | 29.6                                                      | 29.8                                               |                        |
| Rutile TiO <sub>2</sub><br>(From TEM micrographs) |       | $d_{110 \text{EXPT}} = 0.33 \text{ nm}$<br>(from Fig. 3)  | $d_{110 \text{JCPDS}} = 0.324 \text{ nm}$          | 78-1510                |
|                                                   |       | $d_{101 \text{EXPT}} = 0.25 \text{ nm}$<br>(from Fig. S2) | $d_{101 \text{JCPDS}} = 0.248 \text{ nm}$          |                        |

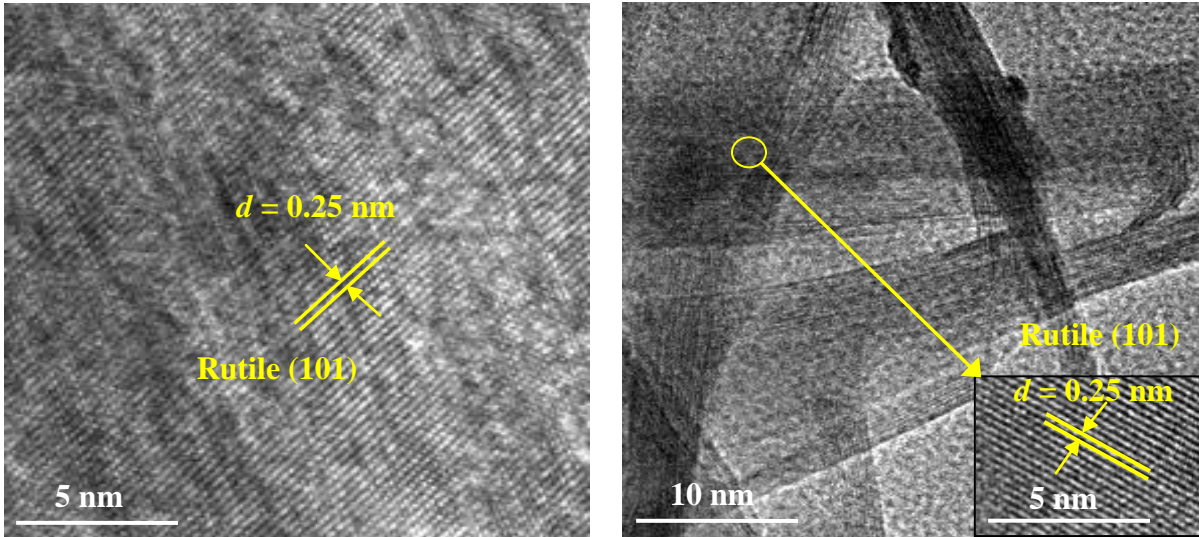

**Figure S2:** HRTEM micrographs of the interior of (a) titania platelet, (b) titania nanorods. The lattice spacing matches with the Rutile (101) planes with  $d$ -value around 0.25 nm.

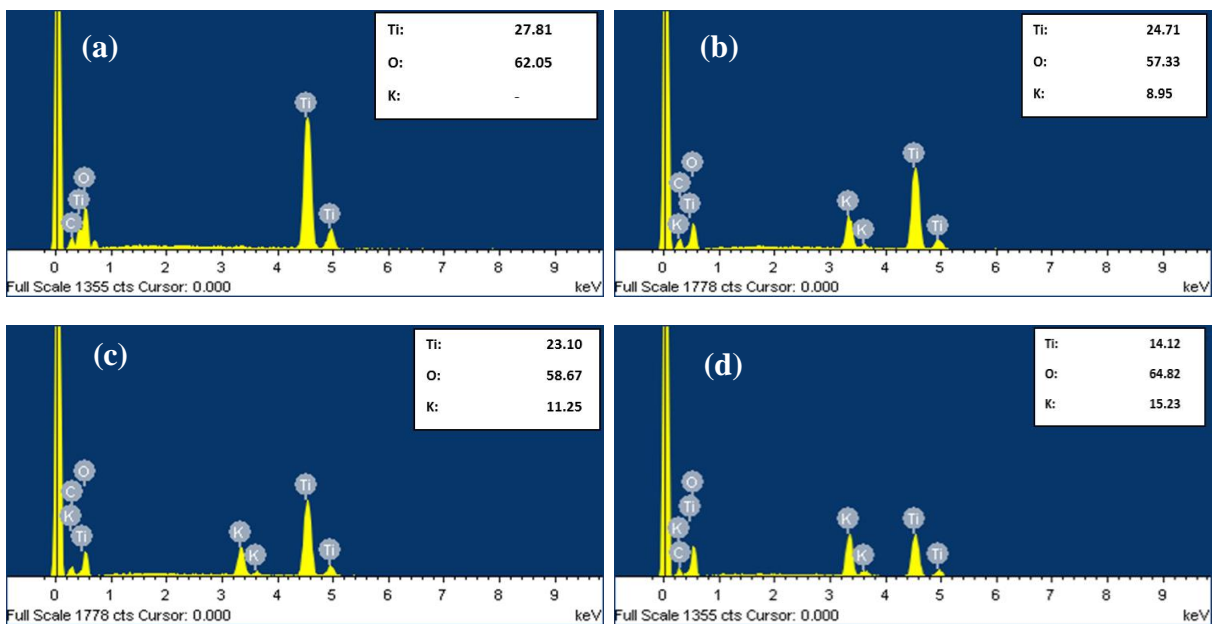

**Figure S3:** EDX micrograph of titania nanostructures hydrothermally prepared at (a) 0.25 M (2D platelets), (b) 0.5 M (2D platelets + 1D nanorods mixture), (c) 1.0 M (1D nanorods) and (d) 5.0 M KOH solutions (1D nanofibers). Insets represent the corresponding elemental composition.

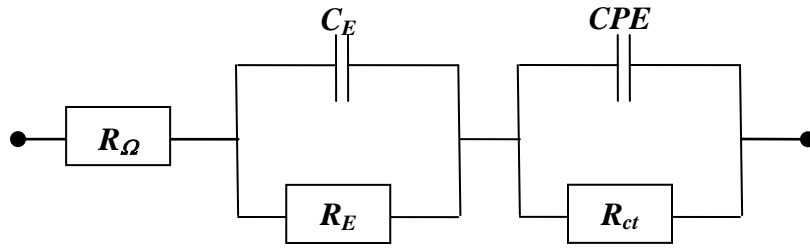

**Figure S4:** Equivalent circuit representation of Ti-TiO<sub>2</sub> nanostructured electrode.  $R_{\Omega}$ : Resistance of the active medium (electrolyte),  $R_E$ : Charge flow resistance across Ti-TiO<sub>2</sub> interface,  $R_{ct}$ : Charge transfer resistance across TiO<sub>2</sub>-Electrolyte interface,  $C_E$ : Capacitance of TiO<sub>2</sub>, including surface states and Helmholtz double layer,  $CPE$ : Constant Phase Element defined by  $CPE-T$  {electrostatic capacitance, (in Farad)} and  $CPE-P$  {a fitting parameter,  $\alpha$ , indicating the degree of deviation from a certain state, (dimensionless)}. For  $\alpha = 0, 1, -1$ , the  $CPE$  represents pure resistor, capacitor and inductor, respectively. For  $\alpha \approx 0.5$ , the  $CPE$  corresponds to Warburg impedance,  $W$  [1-3].

**Table S2** EIS fitted data for all the samples according to the equivalent circuit shown in Fig. S4.

| <b>Samples</b>                                 | <b><math>R_{\Omega}</math></b><br>(ohm) | <b><math>C_E</math></b><br>( $\mu$ F) | <b><math>R_E</math></b><br>(ohm) | <b><math>R_{ct}</math></b><br>(ohm) | <b><math>CPE</math></b><br>( $\mu$ F) | <b><math>\alpha</math></b> |
|------------------------------------------------|-----------------------------------------|---------------------------------------|----------------------------------|-------------------------------------|---------------------------------------|----------------------------|
| <b>0.25M-TO</b><br>(2D platelets)              | 2.11                                    | 66.5                                  | 753.1                            | 9.56                                | 6.99                                  | 0.62                       |
| <b>0.5M-TO</b><br>(2D platelets + 1D nanorods) | 2.24                                    | 72.6                                  | 328.9                            | 7.83                                | 1.45                                  | 0.57                       |
| <b>1.0M-TO</b><br>(1D nanorods)                | 7.87                                    | 96.7                                  | 405.3                            | 12.47                               | 2.01                                  | 0.53                       |
| <b>5.0M-TO</b><br>(1D nanofibers)              | 4.63                                    | 208.7                                 | 676.6                            | 12.09                               | 2.96                                  | 0.50                       |

## References

1. M. Salari, S.H. Aboutalebi, A.T. Chidembo, I.P. Nevirkovets, K. Konstantinov and H. K. Liu, *Phys. Chem. Chem. Phys.*, 2012, **14**, 4770–4779.
2. P. Xiao et al. *Sensors and Actuators B* 134 (2008) 367–372
3. Y. Xie, L. Zhou, J. Lu, *J Mater Sci* (2009) 44:2907–2915.
